# Supplementary material for: Comparison of the Pathway to Hospice Enrollment Between Medicare Advantage and Traditional Medicare
Source: PubMed Central journal article supplement (PMC9938424; doi:10.1001/jamahealthforum.2022.5457), 2023-02-17
Supplement: jamahealthforum-e225457-s001.pdf [file jamahealthforum-e225457-s001.pdf]

## Supplemental Online Content

Ankuda CK, Belanger E, Bunker J, et al. Comparison of the pathway to hospice enrollment between Medicare Advantage and traditional Medicare. *JAMA Health Forum*. Published online 2023;4(2):e225457. doi:10.1001/jamahealthforum.2022.5457

**eTable 1.** Characteristics of Decedents Across County-Level Quartiles of MA Penetration

**eFigure 1.** Proportion of Hospice Enrollees From the Community (With and Without Home Health) Over Time, Including Those in TM in ACOs (“ACO”) vs TM Not in ACOs (“TM”)

**eTable 2.** Adjusted Increase in the Proportion of Community vs Hospital Enrollment, Results for All Sensitivity Analyses

**eFigure 2.** Adjusted Difference in the Proportion of Community Hospice Enrollment in Each Subgroup vs Those Remaining in TM the Entire Last Year of Life (N = 2 194 624)

**eTable 3.** Adjusted Difference in the Proportion of Community Hospice Enrollment in MA vs TM Non-ACO vs. TM in ACOs, 2016 and 2018

**eTable 4.** Characteristics of Decedents by Insurance Status

**eTable 5.** Adjusted Model Predicting Hospice LOS, Stratifying by Insurance Type

**eTable 6.** Adjusted Length of Stay in Hospice by Insurance Type, Only Among Those With a Cancer Diagnosis

**eFigure 3.** Distribution of Hospice Length of Stay Across Insurance Types

**eFigure 4.** Flow Chart of Sample Size and Exclusion Criteria for Study

**eTable 7.** Number and Proportion Missing Data on Hospice Pathway, by Insurance Type

This supplemental material has been provided by the authors to give readers additional information about their work.

| <b>eTable 1. Characteristics of Decedents Across County-Level Quartiles of MA Penetration</b> |                                       |                                       |                                       |                                         |
|-----------------------------------------------------------------------------------------------|---------------------------------------|---------------------------------------|---------------------------------------|-----------------------------------------|
| Variable                                                                                      | 1 <sup>st</sup> Quartile<br>N=482,116 | 2 <sup>nd</sup> Quartile<br>N=691,127 | 3 <sup>rd</sup> Quartile<br>N=717,474 | 4 <sup>th</sup> Quartile<br>N=1,243,086 |
| MA rate, mean (IQR)                                                                           | 10.0 (7.3, 10.5, 12.8)                | 20.7 (18.1, 20.7, 23.2)               | 30.6 (25.8, 30.4, 33.1)               | 45.9 (40.1, 44.1, 49.9)                 |
| Age, mean (IQR)                                                                               | 83.0 (77, 84, 90)                     | 82.9 (76, 84, 89)                     | 83.0 (76, 84, 90)                     | 83.8 (77, 84, 90)                       |
| Male, mean (IQR)                                                                              | 43.9 (43.8, 44.1)                     | 44.0 (43.9, 44.2)                     | 44.4 (44.3, 44.5)                     | 44.4 (44.3, 44.5)                       |
| Dual status, %                                                                                | 23.0 (22.9, 23.2)                     | 23.4 (23.3, 23.5)                     | 20.9 (20.8, 21.0)                     | 17.9 (17.9, 18.0)                       |
| White, %                                                                                      | 88.3 (88.2, 88.4)                     | 87.8 (87.7, 87.8)                     | 87.3 (87.3, 87.4)                     | 80.8 (80.8, 80.9)                       |
| Black, %                                                                                      | 7.3 (7.2, 7.3)                        | 8.0 (7.9, 8.0)                        | 7.3 (7.2, 7.4)                        | 7.5 (7.4, 7.5)                          |
| Hispanic, %                                                                                   | 2.4 (2.3, 2.4)                        | 2.7 (2.7, 2.8)                        | 3.6 (3.6, 3.7)                        | 7.9 (7.9, 8.0)                          |
| Asian, %                                                                                      | 2.0 (2.0, 2.1)                        | 1.5 (1.5, 1.6)                        | 1.8 (1.7, 1.8)                        | 3.8 (3.7, 3.8)                          |
| ESRD, %                                                                                       | 2.2 (2.1, 2.2)                        | 2.3 (2.2, 2.3)                        | 2.3 (2.2, 2.3)                        | 2.4 (2.3, 2.4)                          |
| Cancer, %                                                                                     | 31.8 (31.7, 32.0)                     | 31.4 (31.3, 31.5)                     | 30.1 (30.0, 30.2)                     | 30.3 (30.2, 30.4)                       |
| Dementia, %                                                                                   | 22.1 (22.0, 22.2)                     | 24.4 (24.3, 24.5)                     | 25.5 (25.4, 25.6)                     | 26.2 (26.1, 26.3)                       |
| COPD, %                                                                                       | 6.2 (6.1, 6.3)                        | 6.4 (6.3, 6.4)                        | 6.3 (6.2, 6.3)                        | 5.8 (5.8, 5.9)                          |
| CHF, %                                                                                        | 9.9 (9.8, 10.0)                       | 10.4 (10.3, 10.4)                     | 10.8 (10.7, 10.8)                     | 10.7 (10.6, 10.7)                       |
| CVA, %                                                                                        | 4.1 (4.1, 4.2)                        | 3.8 (3.8, 3.9)                        | 3.8 (3.8, 3.9)                        | 3.9 (3.8, 3.9)                          |
| All other diagnoses, %                                                                        | 29.1 (28.9, 29.2)                     | 27.7 (27.5, 27.8)                     | 28.0 (27.9, 28.1)                     | 27.7 (27.6, 27.7)                       |
| Died in 2011, %                                                                               | 39.1 (38.9, 39.2)                     | 26.2 (26.1, 26.3)                     | 18.0 (17.9, 18.1)                     | 15.5 (15.4, 15.6)                       |
| Died in 2013, %                                                                               | 29.3 (29.2, 29.4)                     | 26.0 (25.9, 25.1)                     | 24.6 (24.5, 24.7)                     | 20.4 (20.3, 20.4)                       |
| Died in 2016, %                                                                               | 18.8 (18.6, 18.9)                     | 26.6 (26.5, 26.7)                     | 27.0 (26.9, 27.0)                     | 27.9 (27.8, 27.9)                       |
| Died in 2018, %                                                                               | 12.9 (12.8, 13.0)                     | 21.2 (21.1, 21.2)                     | 30.4 (30.3, 30.5)                     | 36.3 (36.2, 36.4)                       |

**eFigure 1.** Proportion of Hospice Enrollees From the Community (With and Without Home Health) Over Time, Including Those in TM in ACOs (“ACO”) vs TM Not in ACOs (“TM”)

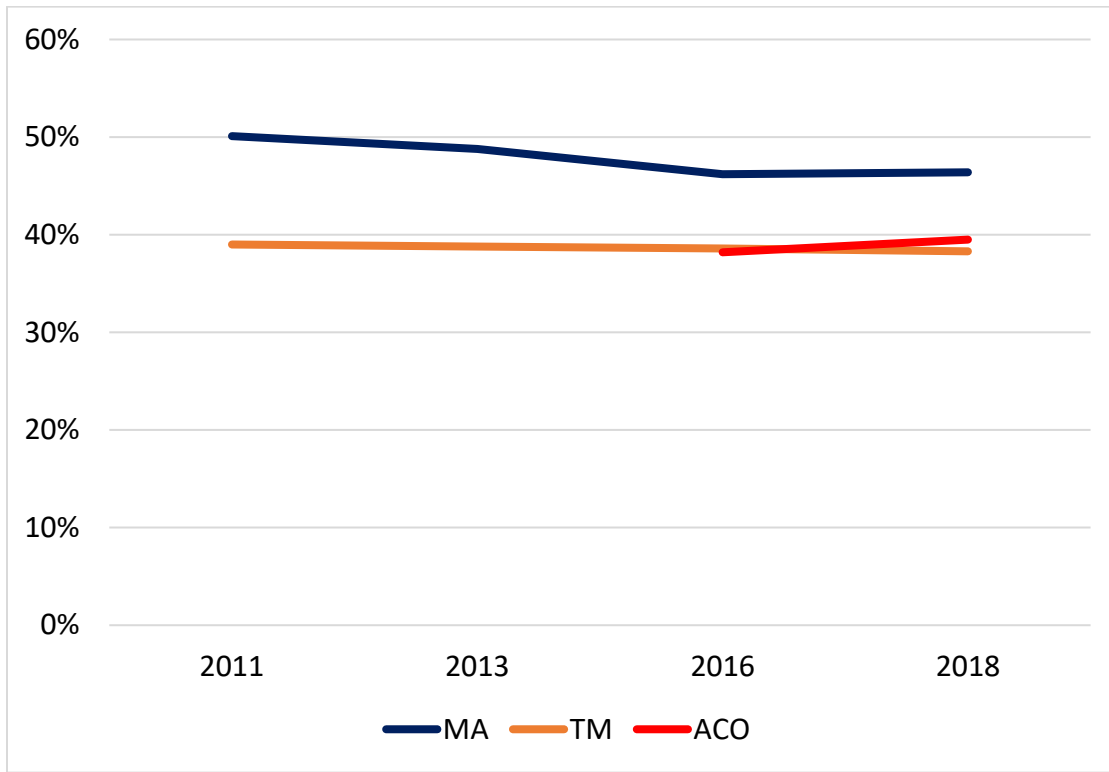

Legend: Data source: Medicare claims data from 2011, 2013, 2016 and 2018. MA= Medicare Advantage, TM= traditional Medicare. MA/TM status determined from insurance enrollment in the last month of life. Community is defined as site of care prior to hospice enrollment being a non-institutional setting with or without home health services, compared to a hospital or nursing facility.

| <b>eTable 2.</b> Adjusted Increase in the Proportion of Community vs Hospital Enrollment, Results for All Sensitivity Analyses                                                                                                                                                                                                                                                                                        |             |                     |                      |
|-----------------------------------------------------------------------------------------------------------------------------------------------------------------------------------------------------------------------------------------------------------------------------------------------------------------------------------------------------------------------------------------------------------------------|-------------|---------------------|----------------------|
|                                                                                                                                                                                                                                                                                                                                                                                                                       | TM- not ACO | MA                  | TM- ACO              |
| Primary model                                                                                                                                                                                                                                                                                                                                                                                                         | Reference   | 8.09% (7.96%-8.21%) | 0.80% (0.60%-1.01%)  |
| Cohort with cancer as hospice primary diagnosis                                                                                                                                                                                                                                                                                                                                                                       | Reference   | 6.64% (6.41%-6.87%) | 0.55% (0.17%-0.93%)  |
| MA/ACO status determined 12 months prior to death                                                                                                                                                                                                                                                                                                                                                                     | Reference   | 7.22% (7.10%-7.34%) | 0.53% (0.33%-0.74%)  |
| Non-duals                                                                                                                                                                                                                                                                                                                                                                                                             | Reference   | 7.82% (7.68%-7.96%) | 0.13% (-0.11%-0.36%) |
| Duals                                                                                                                                                                                                                                                                                                                                                                                                                 | Reference   | 8.52% (8.29%-8.75%) | 3.58% (3.17%-4.00%)  |
| TM= Traditional Medicare, ACO=Accountable Care Organization, MA= Medicare Advantage. For all models, covariates included decedent age at death, sex, race/ethnicity, year of death, dual status, end-stage renal disease status, and hospice primary diagnosis (categorized as cancer, chronic obstructive lung disease (COPD), congestive heart failure (CHF), dementia, cerebral vascular injury (CVA), and other). |             |                     |                      |

**eFigure 2.** Adjusted Difference in the Proportion of Community Hospice Enrollment in Each Subgroup vs Those Remaining in TM the Entire Last Year of Life (N = 2 194 624)

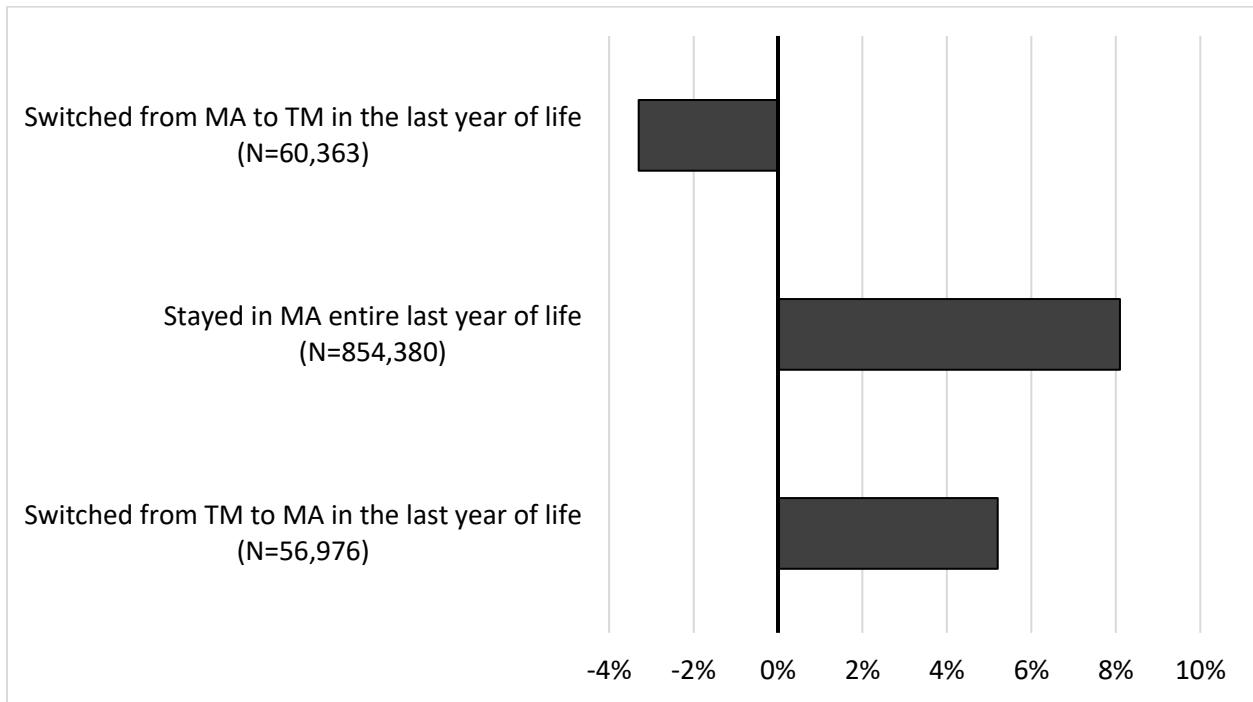

Legend: Data source: Medicare claims data from 2011, 2013, 2016 and 2018. Proportions of >0% indicate greater hospice enrollment in the indicated population vs. those remaining in TM the entire year. Proportions of <0% indicate lower hospice enrollment in the indicated population vs. those remaining in TM the entire year. Model adjusted for age at death, sex, race/ethnicity, year of death, Medicaid status, end-stage renal disease status, and hospice primary diagnosis (categorized as cancer, chronic obstructive lung disease, congestive heart failure, dementia, cerebral vascular injury, or other) and county-level fixed effects.

| <b>eTable 3.</b> Adjusted Difference in the Proportion of Community Hospice Enrollment in MA vs TM Non-ACO vs. TM in ACOs, 2016 and 2018 |                  |         |
|------------------------------------------------------------------------------------------------------------------------------------------|------------------|---------|
|                                                                                                                                          | OR (95% CI)      | p-value |
| TM non-ACO                                                                                                                               | Reference        |         |
| MA                                                                                                                                       | 7.5% (7.3%-7.6%) | <0.001  |
| TM in ACO                                                                                                                                | 0.5% (0.3%-0.8%) | <0.001  |
| TM= Traditional Medicare, MA=Medicare Advantage, ACO= Accountable Care Organization                                                      |                  |         |

**eTable 4.** Characteristics of Decedents by Insurance Status

| Characteristic, N (%): | MA<br>N=911,182 | TM, ACO<br>N=259,793 | TM, not ACO<br>N=1,993,984 |
|------------------------|-----------------|----------------------|----------------------------|
| Age, mean              | 82.6            | 83.4                 | 83.3                       |
| Male                   | 45.5%           | 44.2%                | 43.7%                      |
| Dual status            | 18.9%           | 17.1%                | 21.9%                      |
| Race and ethnicity:    |                 |                      |                            |
| Non-Hispanic White     | 80.7%           | 88.7%                | 86.5%                      |
| Non-Hispanic Black     | 9.0%            | 6.0%                 | 7.1%                       |
| Hispanic               | 7.5%            | 3.1%                 | 4.0%                       |
| Non-Hispanic Asian     | 2.9%            | 2.2%                 | 2.4%                       |
| Hospice diagnosis:     |                 |                      |                            |
| ESRD                   | 1.9%            | 2.3%                 | 2.5%                       |
| Cancer                 | 32.5%           | 32.2%                | 29.7%                      |
| Dementia               | 24.0%           | 27.1%                | 25.2%                      |
| COPD                   | 6.2%            | 6.0%                 | 6.1%                       |
| CHF                    | 10.5%           | 13.3%                | 10.1%                      |
| CVA                    | 3.9%            | 3.3%                 | 4.0%                       |
| All other diagnoses    | 27.2%           | 24.4%                | 28.8%                      |

Data source: Medicare claims data from 2011, 2013, 2016 and 2018. IQR=interquartile range, ESRD= end-stage renal disease, COPD= chronic obstructive pulmonary disease, CHF= congestive heart failure, CVA= cerebrovascular accident.

**eTable 5. Adjusted Model Predicting Hospice LOS, Stratifying by Insurance Type**

| A. Among all insurance types   |             |                         |
|--------------------------------|-------------|-------------------------|
| Site of care prior to hospice: | Coefficient | 95% Confidence Interval |
| Acute care hospital            | (Reference) | (Reference)             |
| Other hospital                 | 0.81        | 0.70-0.91               |
| Skilled nursing facility       | 2.31        | 2.26-2.36               |
| Nursing home                   | 2.85        | 2.82-2.89               |
| Community with home health     | 3.79        | 3.75-3.83               |
| Community without home health  | 4.42        | 4.40-4.45               |
| B. Among those in MA           |             |                         |
| Site of care prior to hospice: | Coefficient | 95% Confidence Interval |
| Acute care hospital            | (Reference) | (Reference)             |
| Other hospital                 | 0.45        | 0.16-0.75               |
| Skilled nursing facility       | 3.28        | 2.87-3.68               |
| Nursing home                   | 2.59        | 2.53-2.64               |
| Community with home health     | 3.17        | 3.09-3.26               |
| Community without home health  | 3.93        | 3.89-3.97               |
| A. Among those in TM           |             |                         |
| Site of care prior to hospice: | Coefficient | 95% Confidence Interval |
| Acute care hospital            | (Reference) | (Reference)             |
| Other hospital                 | 0.88        | 0.76-1.00               |
| Skilled nursing facility       | 2.40        | 2.34-2.45               |
| Nursing home                   | 2.97        | 2.93-3.01               |
| Community with home health     | 3.98        | 3.93-4.03               |
| Community without home health  | 4.65        | 4.62-4.68               |

Data source: Medicare claims data from 2011, 2013, 2016 and 2018. Model is a linear regression predicting length of stay with county-level fixed effects, adjusting for year, insurance type (in Model A), age, sex, race, hospice diagnosis, dual status



| <b>eTable 6. Adjusted Length of Stay in Hospice by Insurance Type, Only Among Those With a Cancer Diagnosis</b>                                                   |                      |         |
|-------------------------------------------------------------------------------------------------------------------------------------------------------------------|----------------------|---------|
|                                                                                                                                                                   | coefficient (95% CI) | p-value |
| TM non-ACO                                                                                                                                                        | Reference            |         |
| MA                                                                                                                                                                | -0.05 (-0.09- -0.01) | 0.02    |
| TM in ACO                                                                                                                                                         | -0.25 (-0.32- -0.19) | <0.001  |
| TM= Traditional Medicare, MA=Medicare Advantage, ACO= Accountable Care Organization. Adjusting for year, age, sex, race, dual status, county-level fixed effects. |                      |         |

**eFigure 3.** Distribution of Hospice Length of Stay Across Insurance Types

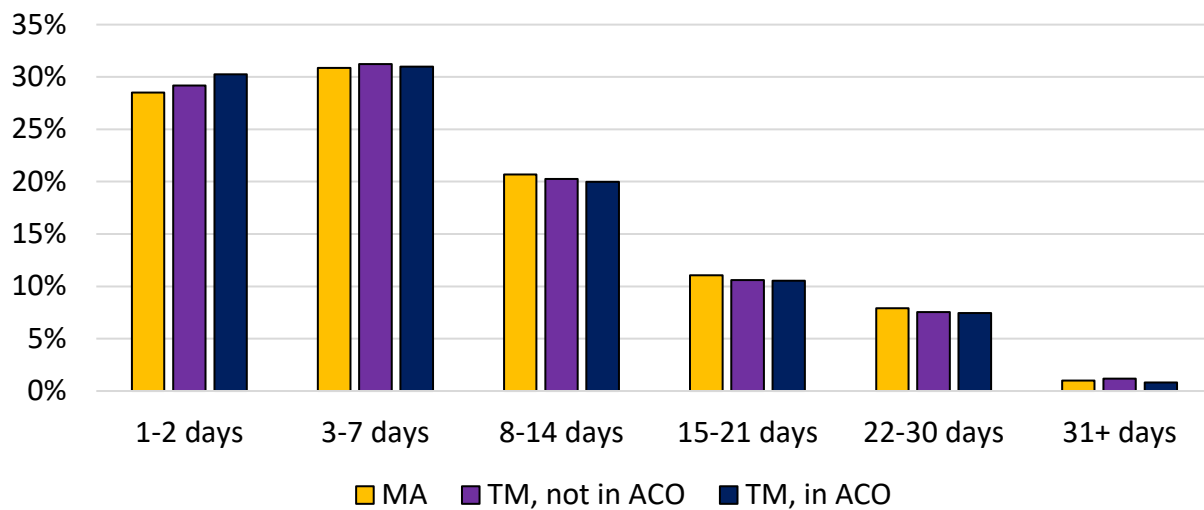

**eFigure 4.** Flow Chart of Sample Size and Exclusion Criteria for Study

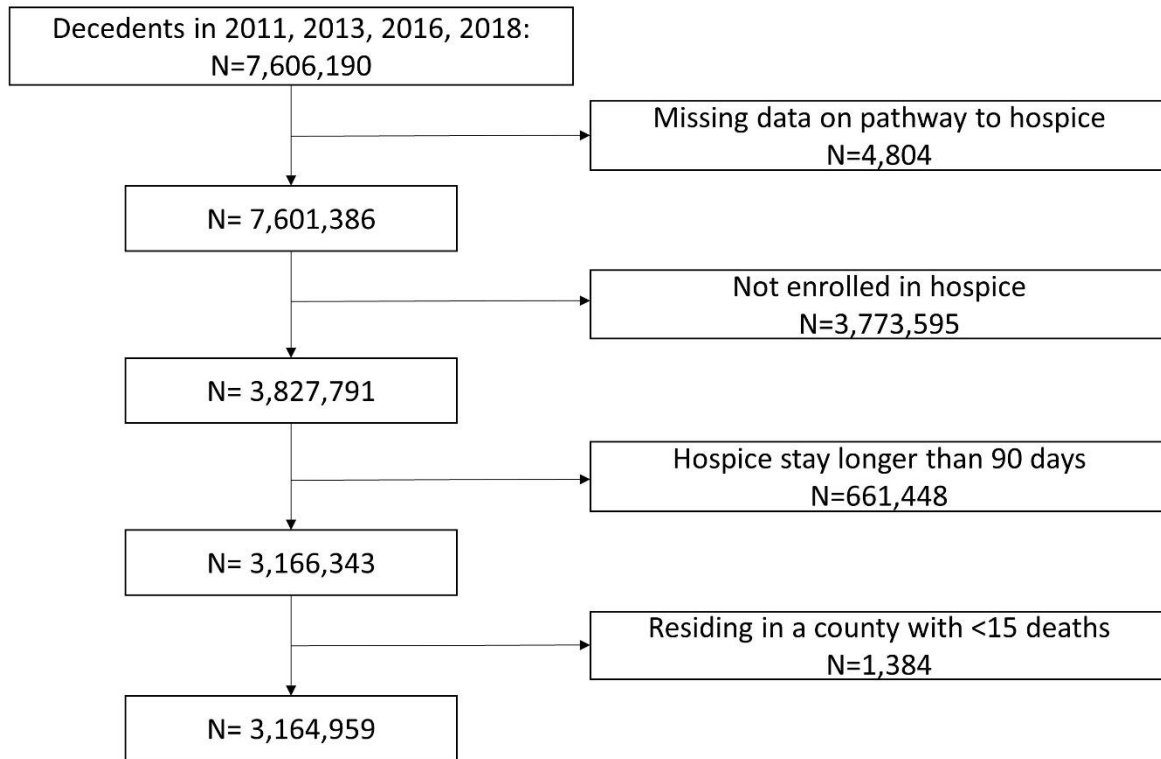

| <b>eTable 7. Number and Proportion Missing Data on Hospice Pathway, by Insurance Type</b> |                 |       |
|-------------------------------------------------------------------------------------------|-----------------|-------|
|                                                                                           | N               | %     |
| TM, not in ACO                                                                            | 3,236/4,974,247 | 0.07% |
| MA                                                                                        | 1,234/2,081,186 | 0.06% |
| TM, in ACO                                                                                | 334/550,757     | 0.06% |
