# Supplementary material for: Comparison of the Pathway to Hospice Enrollment Between Medicare Advantage and Traditional Medicare
Source: PubMed Central journal article supplement (PMC9938424; doi:10.1001/jamahealthforum.2022.5457), 2023-02-17
Supplement: jamahealthforum-e225457-s002.pdf [file jamahealthforum-e225457-s002.pdf]

## Data Sharing Statement

Ankuda. Comparison of the Pathway to Hospice Enrollment Between Medicare Advantage and Traditional Medicare. *JAMA Health Forum*. Published February 17, 2023.

doi:10.1001/jamahealthforum.2022.5457

### Data

**Data available:** No

### Additional Information

**Explanation for why data not available:** The data is Medicare claims data and therefore protected under a data use agreement from sharing. Analytic code is available at <https://doi.org/10.26300/3agx-c091>.
